# Supplementary material for: A ZnO@CuO core–shell heterojunction photoanode modified with ZnFe-LDH for efficient and stable photoelectrochemical performance
Source: Royal Society of Chemistry journal article supplement (doi:10.1039/d1dt00336d), 2021-01-01
Supplement: d1dt00336d1.pdf [file d1dt00336d1.pdf]

**Supplemental Informations:**

Fig. S1 The corresponding EDS spectrum of ZnO@CuO/ZnFe-LDH composite

Fig. S2 Incident photon conversion efficiencies (IPCE) plots of ZnO NRs, ZnO@CuO NRs and ZnO@CuO/ZnFe-LDH composite

Fig. S3 Cycling stability measurement of ZnO@CuO/LDH photoanodes during 1000 cycles

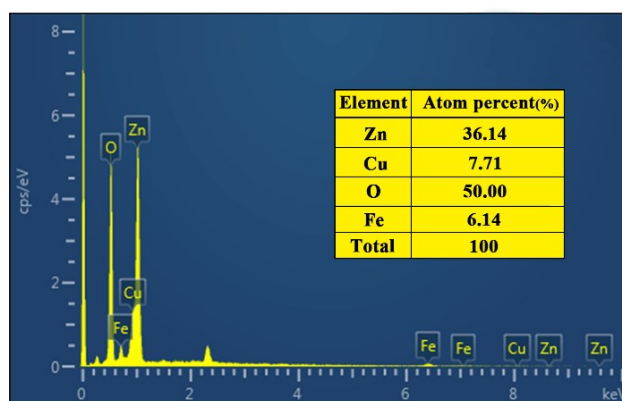

Fig. S1 The corresponding EDS spectrum of ZnO@CuO/ZnFe-LDH composite

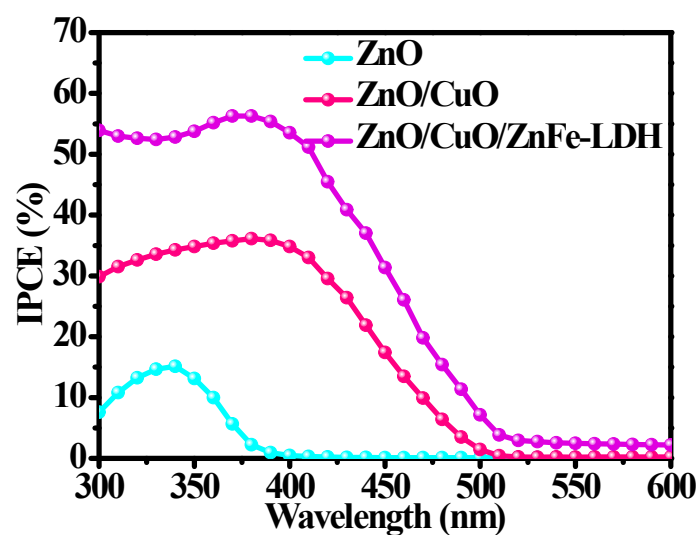

Fig. S2 Incident photon conversion efficiencies (IPCE) plots of ZnO NRs, ZnO@CuO NRs and ZnO@CuO/ZnFe-LDH composite

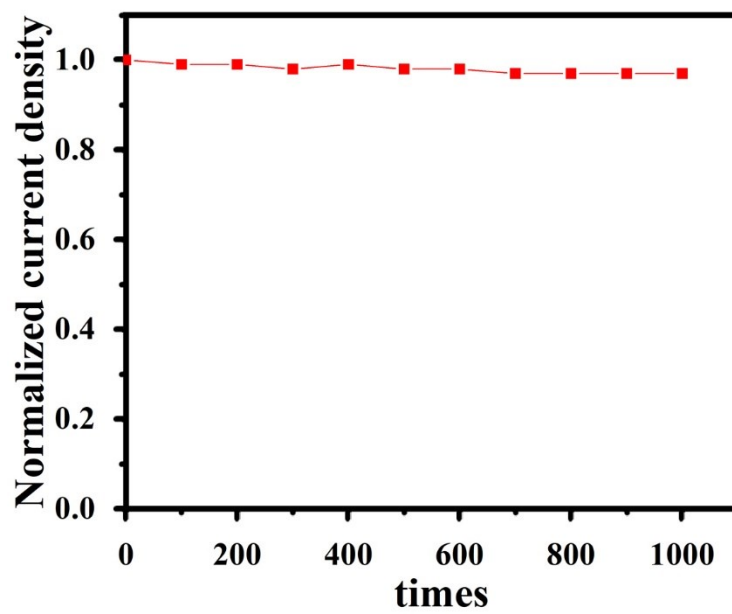

Fig. S3 Cycling stability measurement of ZnO@CuO/LDH photoanodes during 1000 cycles
